# Supplementary material for: The posterior parietal cortex contributes to visuomotor processing for saccades in blindsight macaques
Source: PubMed Central journal article supplement (PMC7933420; doi:10.1038/s42003-021-01804-z), 2021-03-04
Supplement: 42003_2021_1804_MOESM3_ESM.pdf [file 42003_2021_1804_MOESM3_ESM.pdf]

## Description of Additional Supplementary Files

**File name:** Supplementary Data 1

**Description:** An excel file containing the data of figures.

**File name:** Supplementary Data 2

**Description:** An excel file containing the data of tables.
